# Supplementary material for: Vitamin D Impacts the Expression of Runx2 Target Genes and Modulates Inflammation, Oxidative Stress and Membrane Vesicle Biogenesis Gene Networks in 143B Osteosarcoma Cells
Source: MDPI journal article supplement (doi:10.3390/ijms18030642), 2017-03-16
Supplement: s1 [file s1]

**ST 1A.** Most significant vitamin D down regulated genes in 143 B osteosarcoma cells during proliferation

| Symbol                 | Entrez Gene Name                                | Affymetrix  | Fold change | p-value  | Top Diseases and Functions                                                                             |
|------------------------|-------------------------------------------------|-------------|-------------|----------|--------------------------------------------------------------------------------------------------------|
| FGF12                  | fibroblast growth factor 12                     | 207501_s_at | -1.369      | 1.95E-02 | Cellular Development, Proliferation, Hematological System Development and Function                     |
| CAPN3                  | calpain 3                                       | 214475_x_at | -1.331      | 9.75E-03 | Cellular Development, Cellular Growth and Proliferation, Hematological System Development and Function |
| THBS3                  | thrombospondin 3                                | 209561_at   | -1.293      | 3.81E-02 | Cellular Development, Embryonic Development, Nervous System Development and Function                   |
| *KLK7 <sup>a</sup>     | kallikrein-related peptidase 7                  | 205778_at   | -1.261      | 1.07E-03 | Cardiovascular Disease, Cellular Assembly and Organization, Developmental Disorder                     |
| TACSTD2                | tumor-associated calcium signal transducer 2    | 202285_s_at | -1.261      | 2.90E-02 | Cell Death and Survival, Embryonic Development, Cell-To-Cell Signaling and Interaction                 |
| BCL2L10                | BCL2-like 10 (apoptosis facilitator)            | 221320_at   | -1.258      | 1.94E-02 | Cardiovascular Disease, Cellular Assembly and Organization, Developmental Disorder                     |
| MEPE                   | matrix extracellular phosphoglycoprotein        | 221150_at   | -1.255      | 4.01E-02 | Cell-To-Cell Signaling and Interaction, Cell Signaling, Molecular Transport                            |
| *HIC1 <sup>a</sup>     | hypermethylated in cancer 1                     | 208461_at   | -1.251      | 1.39E-02 | Cellular Development, Cellular Growth and Proliferation, Hematological System Development and Function |
| *RARB <sup>a,b,c</sup> | retinoic acid receptor, beta                    | 208530_s_at | -1.242      | 1.01E-02 | Cell Death and Survival, Embryonic Development, Cell-To-Cell Signaling and Interaction                 |
| CASP1                  | caspase 1, apoptosis-related cysteine peptidase | 209970_x_at | -1.237      | 1.27E-02 | Cell Death and Survival, Embryonic Development, Cell-To-Cell Signaling and Interaction                 |

Superscripts a, b, and c represent genes/proteins as biomarkers biomarker for (a) diagnosis, (b) efficacy, and (c) prognosis

**ST 1B.** Most significant vitamin D up regulated genes in 143 B osteosarcoma cells during proliferation

| Symbol               | Entrez Gene Name                                                          | Affymetrix ID | Fold Change | P value  | Top diseases and Functions                                                                             |
|----------------------|---------------------------------------------------------------------------|---------------|-------------|----------|--------------------------------------------------------------------------------------------------------|
| FBN1                 | fibrillin 1                                                               | 202766_s_at   | 1.273       | 2.23E-02 | Cell Death and Survival, Embryonic Development, Cell-To-Cell Signaling and Interaction                 |
| NFATC3               | nuclear factor of activated T-cells, cytoplasmic, calcineurin-dependent 3 | 210555_s_at   | 1.248       | 1.53E-02 | Cell Death and Survival, Embryonic Development, Cell-To-Cell Signaling and Interaction                 |
| ADAM21 <sup>b</sup>  | ADAM metalloproteinase domain 21                                          | 207665_at     | 1.237       | 2.62E-02 | Cellular Development, Cellular Growth and Proliferation, Hematological System Development and Function |
| HSPB8                | heat shock 22kDa protein 8                                                | 221667_s_at   | 1.232       | 2.13E-02 | Cell Death and Survival, Embryonic Development, Cell-To-Cell Signaling and Interaction                 |
| CCNT2                | cyclin T2                                                                 | 214638_s_at   | 1.231       | 4.78E-02 | Cardiovascular Disease, Cellular Assembly and Organization, Developmental Disorder                     |
| PHF7                 | PHD finger protein 7                                                      | 215622_x_at   | 1.222       | 4.49E-02 | Cardiovascular Disease, Cellular Assembly and Organization, Developmental Disorder                     |
| TLL2                 | tolloid-like 2                                                            | 215008_at     | 1.219       | 2.18E-02 | Cellular Development, Cellular Growth and Proliferation, Hematological System Development and Function |
| RARRES1 <sup>a</sup> | retinoic acid receptor responder (tazarotene induced) 1                   | 206391_at     | 1.213       | 2.37E-02 | Cellular Development, Cellular Growth and Proliferation, Hematological System Development and Function |
| BCL2L14              | BCL2-like 14 (apoptosis facilitator)                                      | 221241_s_at   | 1.208       | 3.15E-02 | Cell Death and Survival, Embryonic Development, Cell-To-Cell Signaling and Interaction                 |
| TLR6                 | toll-like receptor 6                                                      | 207446_at     | 1.205       | 1.07E-02 | Cell Death and Survival, Embryonic Development, Cell-To-Cell Signaling and Interaction                 |

Superscripts a, b, and c represent genes/proteins as biomarkers biomarker for (a) diagnosis, (b) efficacy, and (c) prognosis

**ST 1C.** Most significant vitamin D down regulated genes in 143 B osteosarcoma cells during post-proliferation

| Symbol            | Entrez Gene Name                                                                                  | Affymetrix ID | Fold change | P value  | Top diseases and Functions                                   |
|-------------------|---------------------------------------------------------------------------------------------------|---------------|-------------|----------|--------------------------------------------------------------|
| ARL3              | ADP-ribosylation factor-like 3                                                                    | 213433_at     | -1.365      | 3.75E-02 | Hereditary Disorder, Ophthalmic Disease, Gene Expression     |
| PTPRN             | protein tyrosine phosphatase, receptor type, N                                                    | 204945_at     | -1.363      | 4.56E-03 | Cell Signaling, Molecular Transport, Nucleic Acid Metabolism |
| ANKRD6            | ankyrin repeat domain 6                                                                           | 204672_s_at   | -1.361      | 3.23E-02 | Hereditary Disorder, Ophthalmic Disease, Gene Expression     |
| SMARCA4           | SWI/SNF related, matrix associated, actin dependent regulator of chromatin, subfamily a, member 4 | 214360_at     | -1.302      | 1.22E-02 | Cell Death and Survival, Cell Signaling, Molecular Transport |
| CTNNA2            | catenin (cadherin-associated protein), alpha 2                                                    | 205373_at     | -1.285      | 2.14E-02 | Cell Death and Survival, Cell Signaling, Molecular Transport |
| KLK3 <sup>d</sup> | kallikrein-related peptidase 3                                                                    | 204583_x_at   | -1.28       | 9.14E-03 | Cell Death and Survival, Cell Signaling, Molecular Transport |
| MMP28             | matrix metalloproteinase 28                                                                       | 219909_at     | -1.265      | 4.37E-02 | Cell Death and Survival, Cell Signaling, Molecular Transport |
| ANK1              | ankyrin 1, erythrocytic                                                                           | 205389_s_at   | -1.256      | 4.71E-02 | Cell Death and Survival, Cell Signaling, Molecular Transport |
| ERCC6             | excision repair cross-complementing rodent repair deficiency, complementation group 6             | 207347_at     | -1.24       | 4.43E-02 | Cell Signaling, Molecular Transport, Nucleic Acid Metabolism |
| PAWR <sup>c</sup> | PRKC, apoptosis, WT1, regulator                                                                   | 214237_x_at   | -1.236      | 1.41E-02 | Cell Signaling, Molecular Transport, Nucleic Acid Metabolism |

Superscripts c and d represent genes/proteins as biomarkers biomarker for (c) prognosis and (d) disease progression

**ST 1D.** Most significant vitamin D up regulated genes in 143 B osteosarcoma cells during post-proliferation

| Symbol             | Entrez Gene Name                                         | Affymetrix ID | Fold change | P value | Top diseases and Functions                                                                          |
|--------------------|----------------------------------------------------------|---------------|-------------|---------|-----------------------------------------------------------------------------------------------------|
| CACNB1             | calcium channel, voltage-dependent, beta 1 subunit       | 210967_x_at   | 1.346       | 0.0339  | Hereditary Disorder, Ophthalmic Disease, Gene Expression                                            |
| CRH <sup>b</sup>   | corticotropin releasing hormone                          | 205629_s_at   | 1.34        | 0.0436  | Cell Death and Survival, Cell Signaling, Molecular Transport                                        |
| GPR20              | G protein-coupled receptor 20                            | 214510_at     | 1.327       | 0.00457 | Cellular Function and Maintenance, Cell-To-Cell Signaling and Interaction, Cell Signaling           |
| ATF5               | activating transcription factor 5                        | 217389_s_at   | 1.32        | 0.003   | Cell Signaling, Molecular Transport, Nucleic Acid Metabolism                                        |
| ABCA4              | ATP-binding cassette, sub-family A (ABC1), member 4      | 210082_at     | 1.318       | 0.00239 | Dermatological Diseases and Conditions, Developmental Disorder, Organismal Injury and Abnormalities |
| ACAP1              | ArfGAP with coiled-coil, ankyrin repeat and PH domains 1 | 205212_s_at   | 1.312       | 0.0154  | Cell Death and Survival, Organ Morphology, Hematological System Development and Function            |
| MAPK8IP3           | mitogen-activated protein kinase 8 interacting protein 3 | 216137_s_at   | 1.278       | 0.0306  | Cell Death and Survival, Organ Morphology, Hematological System Development and Function            |
| SFRP5 <sup>a</sup> | secreted frizzled-related protein 5                      | 207468_s_at   | 1.275       | 0.0294  | Hereditary Disorder, Ophthalmic Disease, Gene Expression                                            |
| HOXB8              | homeobox B8                                              | 221278_at     | 1.27        | 0.0386  | Dermatological Diseases and Conditions, Developmental Disorder, Organismal Injury and Abnormalities |
| GPR162             | G protein-coupled receptor 162                           | 205056_s_at   | 1.264       | 0.00865 | Cellular Function and Maintenance, Cell-To-Cell Signaling and Interaction, Cell Signaling           |

Superscripts a and b represent genes/proteins as biomarkers biomarker for (a) diagnosis, and (b) efficacy

**ST 1E.** Most significant vitamin D down regulated genes in 143 B osteosarcoma cells during differentiation

| Symbol  | Entrez Gene Name                                        | Affymetrix ID | Fold Change | p-value  | Top Diseases and Function                                                          |
|---------|---------------------------------------------------------|---------------|-------------|----------|------------------------------------------------------------------------------------|
| ENTPD2  | ectonucleoside triphosphate diphosphohydrolase 2        | 207372_s_at   | -1.36       | 1.80E-02 | Connective Tissue Disorders, Inflammatory Disease, Skeletal and Muscular Disorders |
| CASQ2   | calsequestrin 2 (cardiac muscle)                        | 207317_s_at   | -1.346      | 1.34E-02 | Immunological Disease, Organismal Injury and Abnormalities, Molecular Transport    |
| NCR3    | natural cytotoxicity triggering receptor 3              | 211010_s_at   | -1.345      | 2.27E-03 | Connective Tissue Disorders, Inflammatory Disease, Skeletal and Muscular Disorders |
| ABCC9   | ATP-binding cassette, sub-family C (CFTR/MRP), member 9 | 208562_s_at   | -1.316      | 1.08E-02 | Immunological Disease, Organismal Injury and Abnormalities, Molecular Transport    |
| STAT4   | signal transducer and activator of transcription 4      | 206118_at     | -1.311      | 1.04E-02 | Connective Tissue Disorders, Inflammatory Disease, Skeletal and Muscular Disorders |
| FOXH1   | forkhead box H1                                         | 207644_at     | -1.285      | 3.71E-02 | Nutritional Disease, Cellular Assembly and Organization, Cellular Movement         |
| ARL4D   | ADP-ribosylation factor-like 4D                         | 203587_at     | -1.281      | 8.31E-03 | Connective Tissue Disorders, Developmental Disorder, Hereditary Disorder           |
| ZNF225  | zinc finger protein 225                                 | 207125_at     | -1.28       | 3.04E-02 | Cellular Development, Cell Morphology, Cellular Function and Maintenance           |
| ZNF780A | zinc finger protein 780A                                | 215570_s_at   | -1.278      | 4.05E-02 | Transcription regulation                                                           |
| ADORA2A | adenosine A2a receptor                                  | 205013_s_at   | -1.269      | 1.22E-02 | Immunological Disease, Organismal Injury and Abnormalities, Molecular Transport    |

**ST 1F.** Most significant vitamin D up regulated genes in 143 B osteosarcoma cells during differentiation

| Symbol             | Entrez Gene Name                                                            | Affymetrix ID | FC    | P value | Top Diseases and Function                                                          |
|--------------------|-----------------------------------------------------------------------------|---------------|-------|---------|------------------------------------------------------------------------------------|
| UBE3A              | ubiquitin protein ligase E3A                                                | 214980_at     | 1.413 | 0.0104  | Connective Tissue Disorders, Inflammatory Disease, Skeletal and Muscular Disorders |
| TFAP2B             | transcription factor AP-2 beta (activating enhancer binding protein 2 beta) | 214451_at     | 1.269 | 0.00766 | Connective Tissue Disorders, Developmental Disorder, Hereditary Disorder           |
| AJAP1              | adherens junctions associated protein 1                                     | 215789_s_at   | 1.268 | 0.0412  | Embryonic Development, Organ Development, Organismal Development                   |
| CDK19              | cyclin-dependent kinase 19                                                  | 211706_s_at   | 1.26  | 0.0183  | Connective Tissue Disorders, Developmental Disorder, Hereditary Disorder           |
| GTPBP1             | GTP binding protein 1                                                       | 205276_s_at   | 1.255 | 0.0288  | Nutritional Disease, Cellular Assembly and Organization, Cellular Movement         |
| PKLR               | pyruvate kinase, liver and RBC                                              | 222078_at     | 1.249 | 0.0145  | Connective Tissue Disorders, Inflammatory Disease, Skeletal and Muscular Disorders |
| RNF8               | ring finger protein 8, E3 ubiquitin protein ligase                          | 203161_s_at   | 1.248 | 0.0484  | Connective Tissue Disorders, Developmental Disorder, Hereditary Disorder           |
| STAT6 <sup>e</sup> | signal transducer and activator of transcription 6, interleukin-4 induced   | 201332_s_at   | 1.246 | 0.0259  | Connective Tissue Disorders, Inflammatory Disease, Skeletal and Muscular Disorders |
| CDH17              | cadherin 17, LI cadherin (liver-intestine)                                  | 209847_at     | 1.241 | 0.0337  | Nutritional Disease, Cellular Assembly and Organization, Cellular Movement         |
| MAP3K13            | mitogen-activated protein kinase kinase kinase 13                           | 211083_s_at   | 1.241 | 0.00181 | Immunological Disease, Organismal Injury and Abnormalities, Molecular Transport    |
| KANK2              | KN motif and ankyrin repeat domains 2                                       | 221068_at     | 1.227 | 0.0185  | Nutritional Disease, Cellular Assembly and Organization, Cellular Movement         |

Superscript e represents genes/proteins as biomarkers biomarker for response to therapy
